# Supplementary material
Source: Royal Society of Chemistry journal article supplement (doi:10.1039/d6ta00812g)
Supplement: d6ta00812g1.pdf [file d6ta00812g1.pdf]

Electronic Supplementary Information for:

## Commodity Elastomer-Derived Ordered Mesoporous Hard Carbon for High-Performance Sodium-Ion Battery Anodes

Anthony Griffin,<sup>a,†</sup> Hao Nguyen,<sup>b,†</sup> Jeff Aguinaga<sup>a</sup>, Derek L. Patton<sup>a</sup>, Zhe Qiang<sup>a,\*</sup>, and Shuya Wei<sup>b,\*</sup>

<sup>a</sup>School of Polymer Science and Engineering, The University of Southern Mississippi, Hattiesburg, MS 39406, USA

<sup>b</sup>Department of Chemical and Biological Engineering, The University of New Mexico, Albuquerque, NM 87131, USA

<sup>†</sup>co-first authors

Corresponding authors: Z. Q. ([zhe.qiang@usm.edu](mailto:zhe.qiang@usm.edu)), S. W. ([swei@unm.edu](mailto:swei@unm.edu))

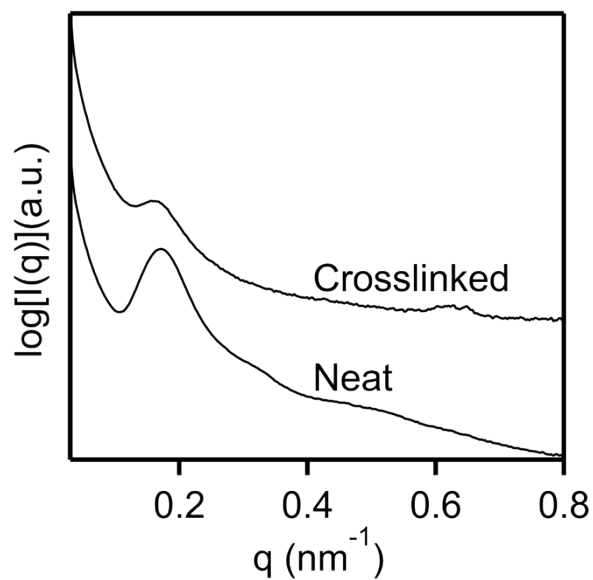

Figure S1. SAXS profiles for neat and crosslinked SEBS at at 145 °C for 75 min.

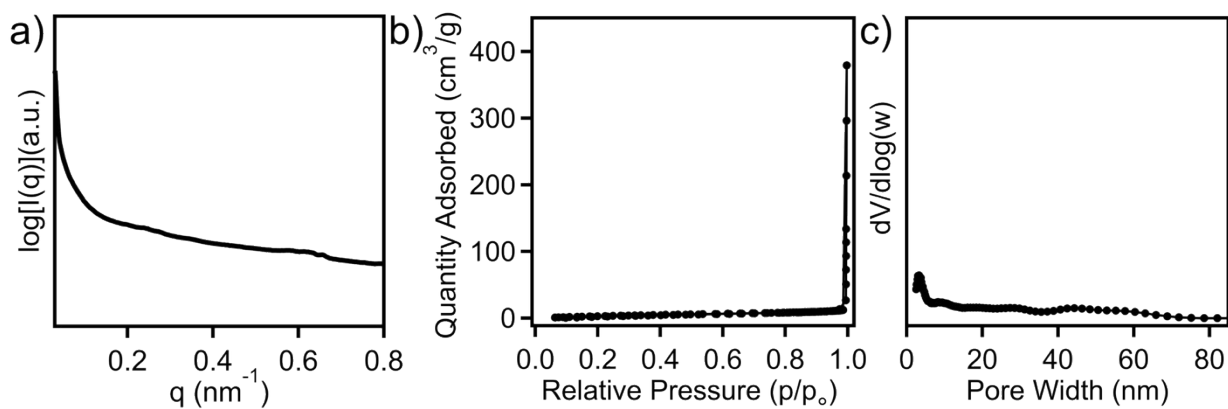

Figure S2. (a) SAXS profile, (b) nitrogen sorption isotherm, and (c) pore size distribution for a disordered carbon.

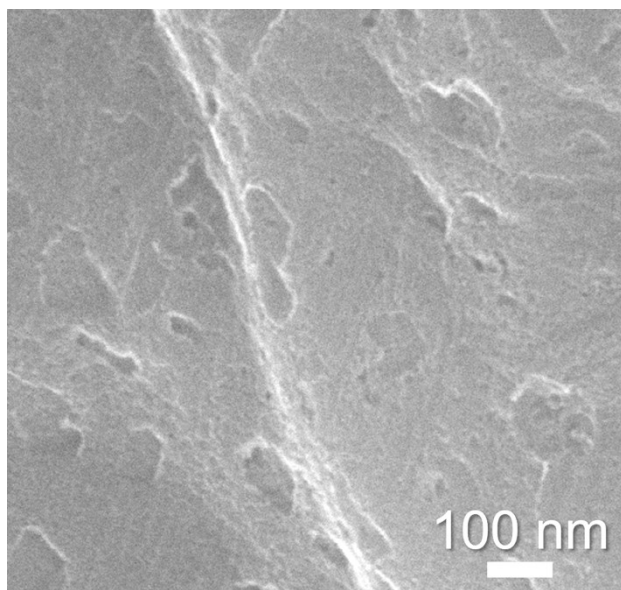

Figure S3. SEM micrograph of the disordered carbon prepared by pyrolysis of under-crosslinked

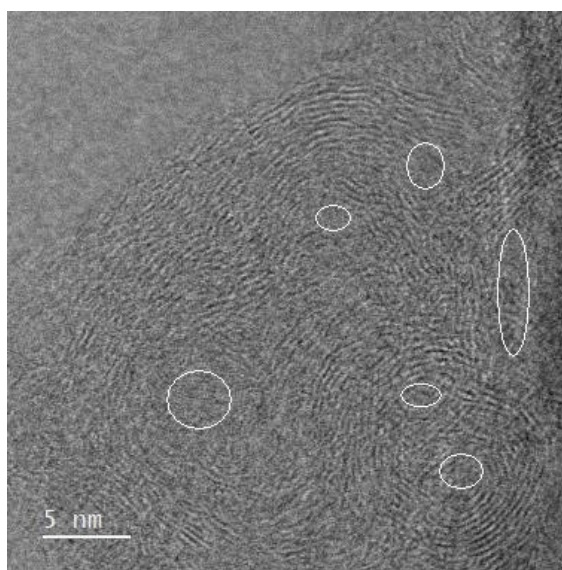

SBS.

Figure S4. TEM image of OMHC-1300°C with closed-pore structures.

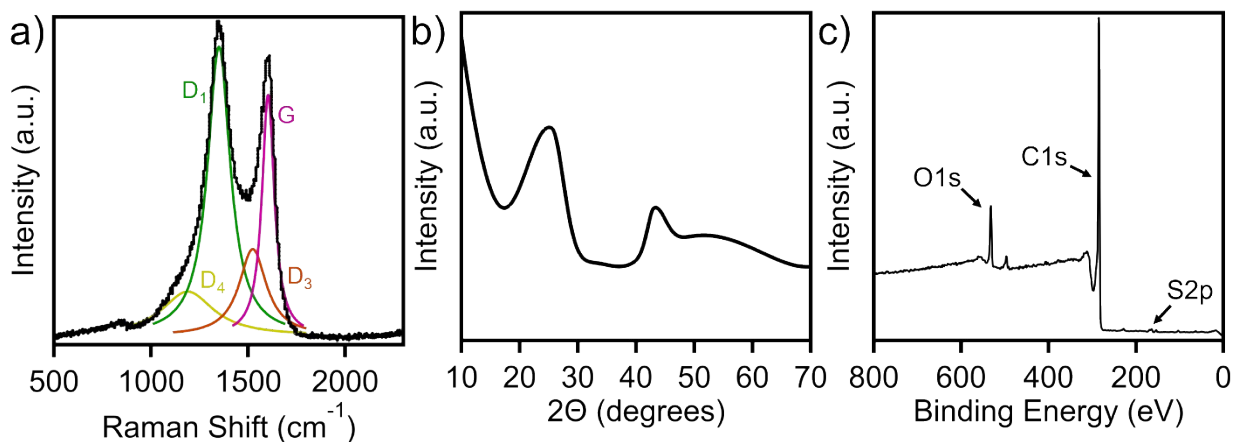

Figure S5. (a) Raman spectra, (b) representative XRD pattern, and (c) XPS survey scan for the disordered carbon prepared by pyrolysis of under-crosslinked SBS.

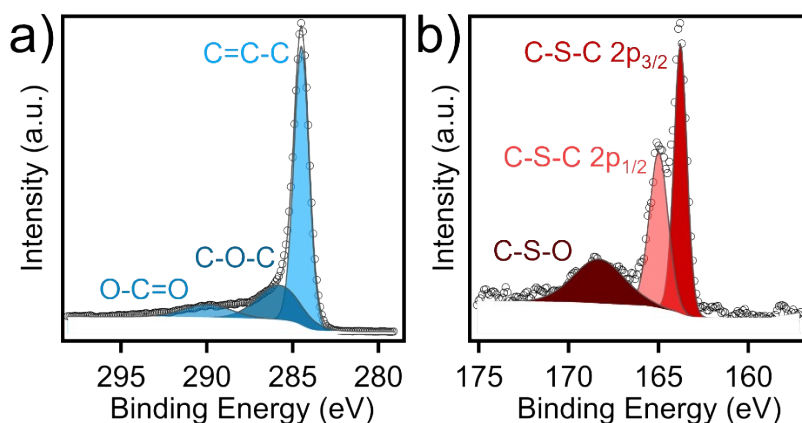

Figure S6. High-resolution XPS scans depicting (a) carbon and (b) sulfur bonding environments for a TPE-derived OMHC carbonized at 800 °C.

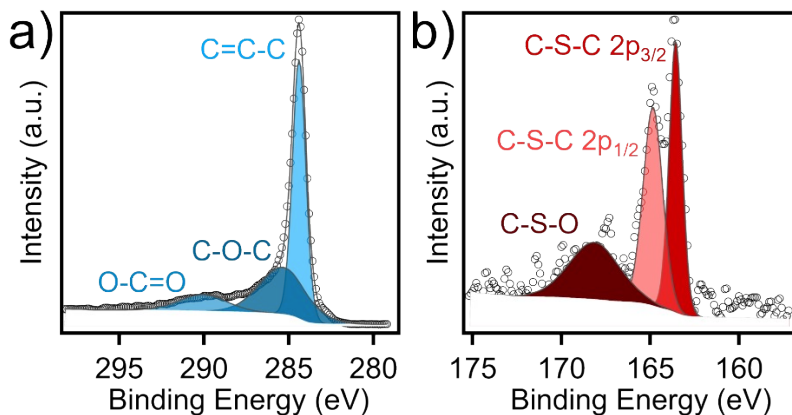

Figure S7. High-resolution XPS scans depicting (a) carbon and (b) sulfur bonding environments for a TPE-derived OMHC carbonized at 1,100 °C.

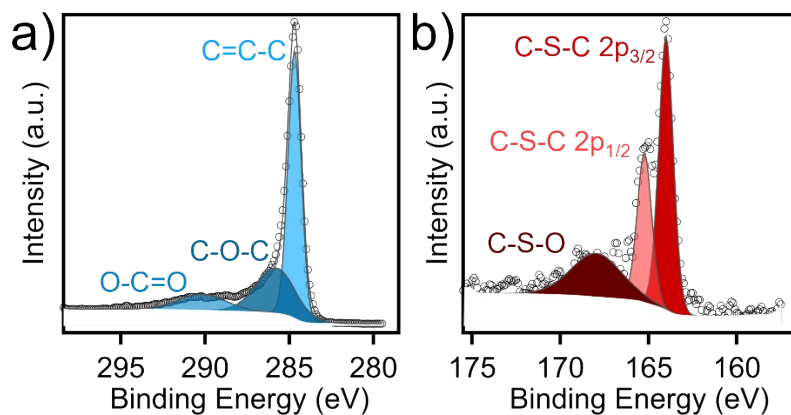

Figure S8. High-resolution XPS scans depicting (a) carbon and (b) sulfur bonding environments for a TPE-derived OMHC carbonized at 1,300 °C.

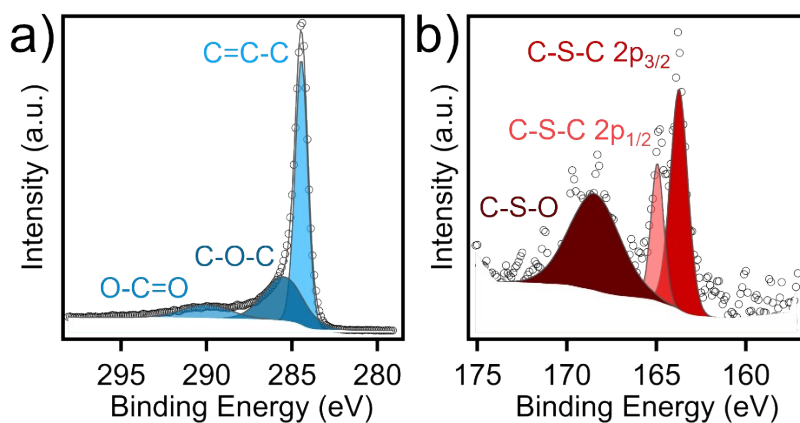

Figure S9. High-resolution XPS scans depicting (a) carbon and (b) sulfur bonding environments for a disordered carbon prepared by pyrolysis of under-crosslinked SBS.

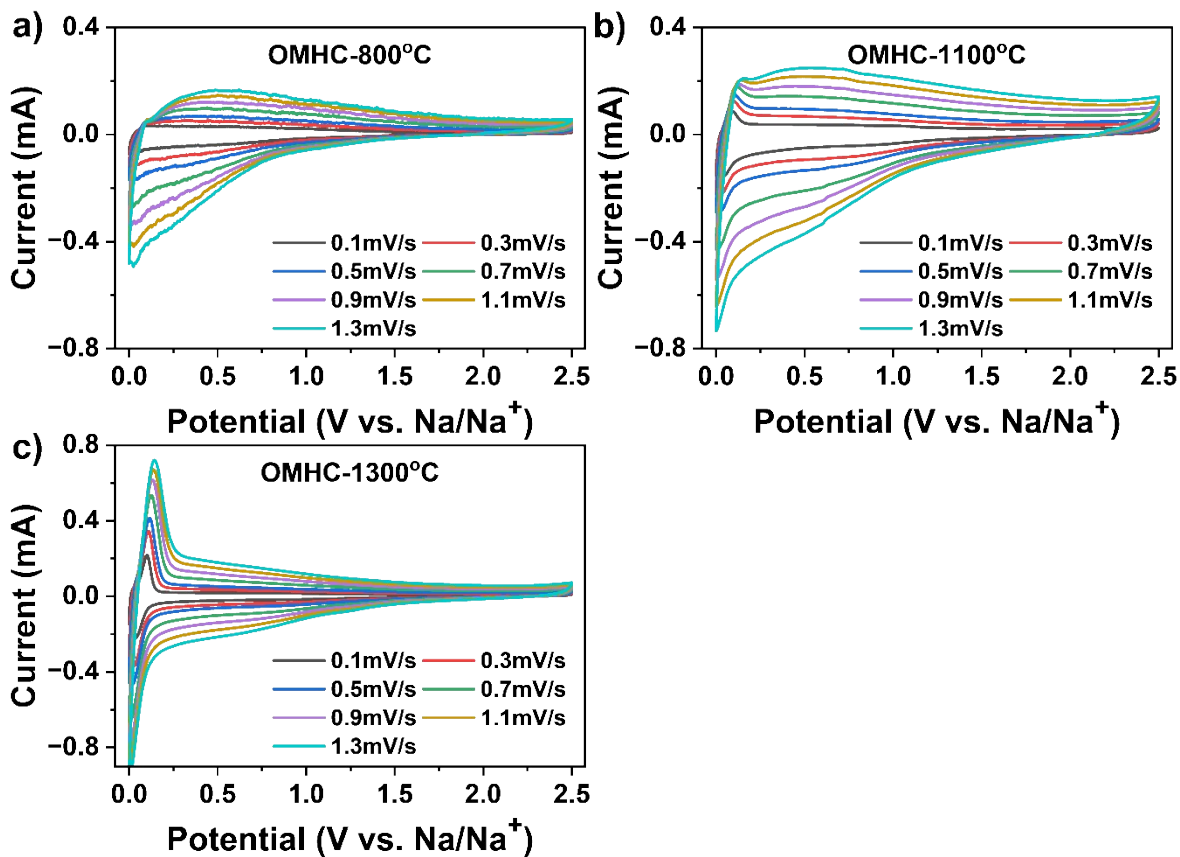

Figure S10. CV of a) OMHC-800 °C, b) OMHC-1100 °C and c) OMHC-1300 °C at various scan rates.

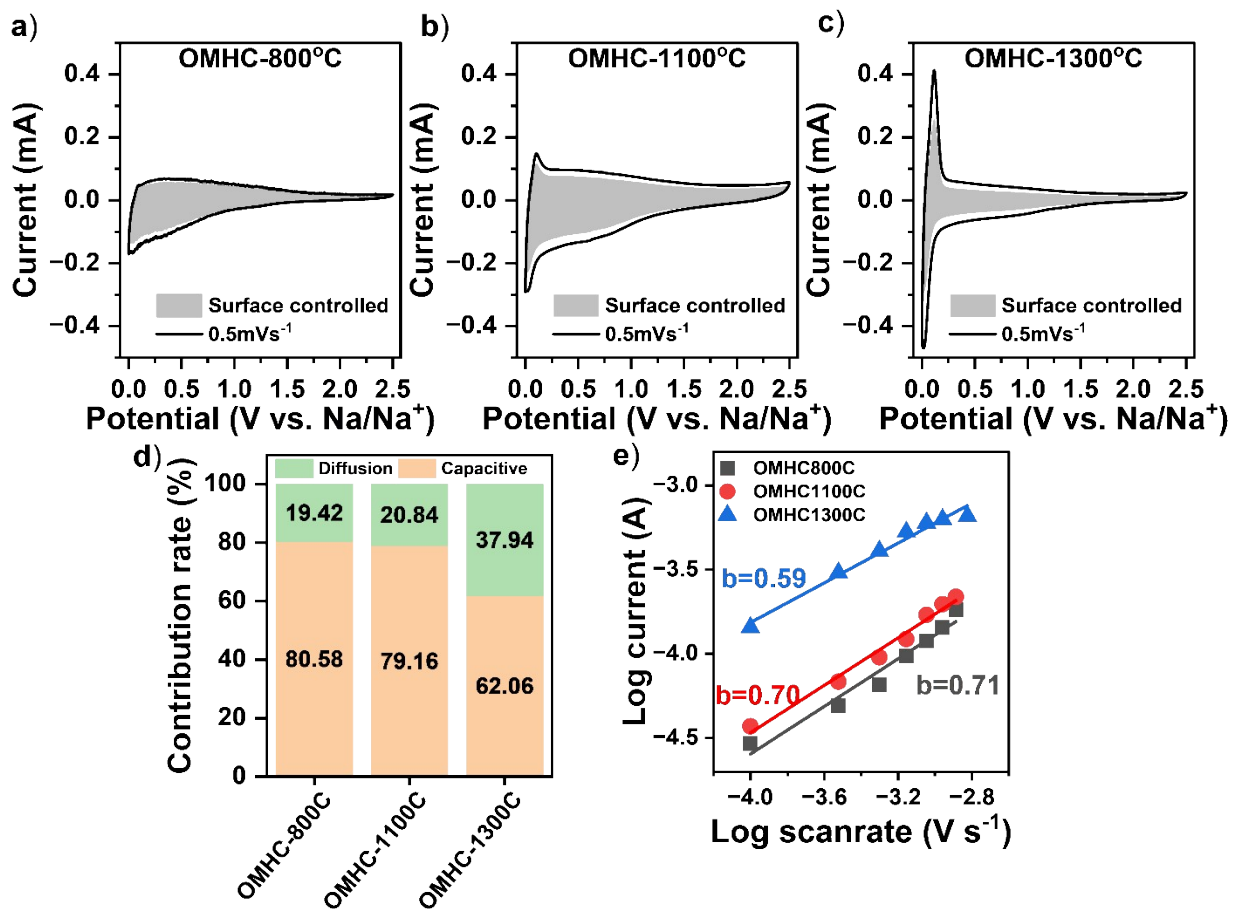

Figure S11. The visualization of the results after Dunn's analysis for a) OMHC-800 °C, b) OMHC-1100 °C and c) OMHC-1300 °C at 0.5 mV s<sup>-1</sup>. d) Comparison of diffusion controlled and capacitive controlled of HC samples at 0.5mV s<sup>-1</sup>. e) b-value determination of HC samples.

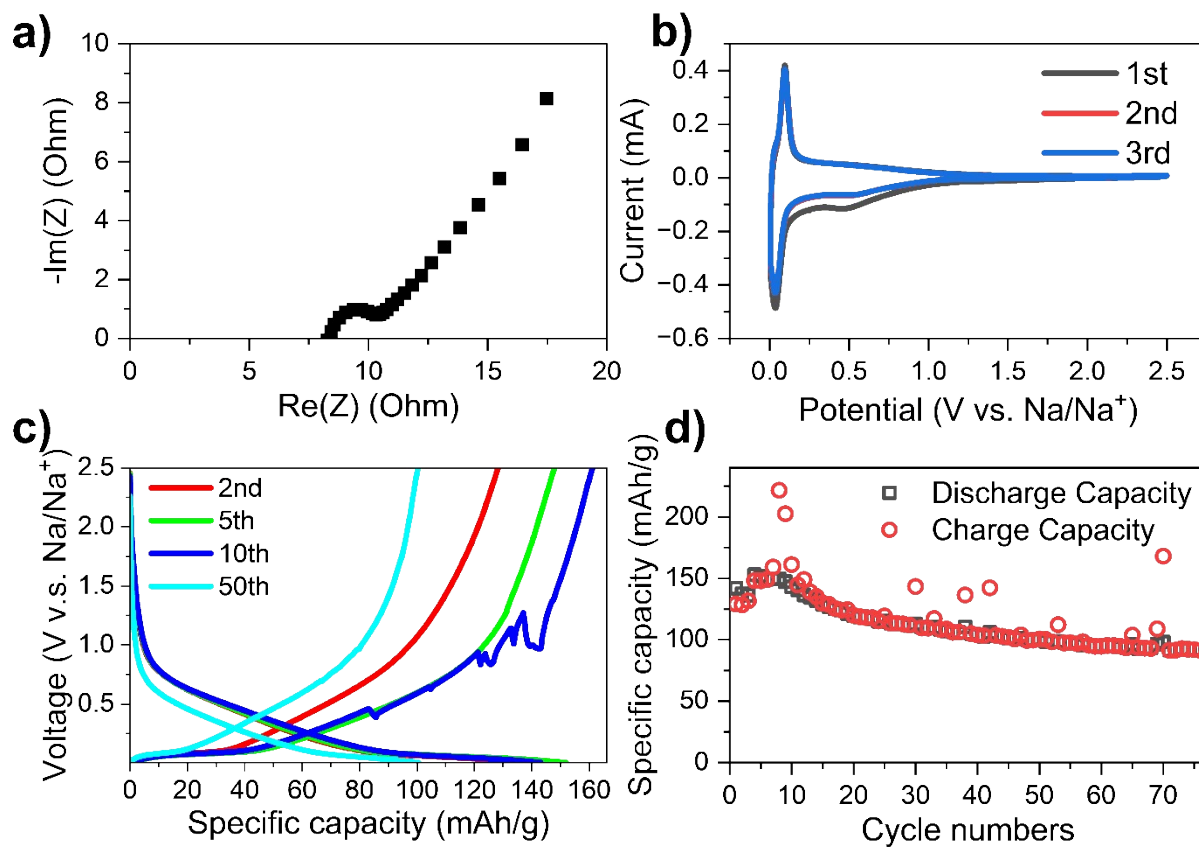

Figure S12. a) EIS, b) CV, c) GCD profile and d) GCD of the disordered carbon.

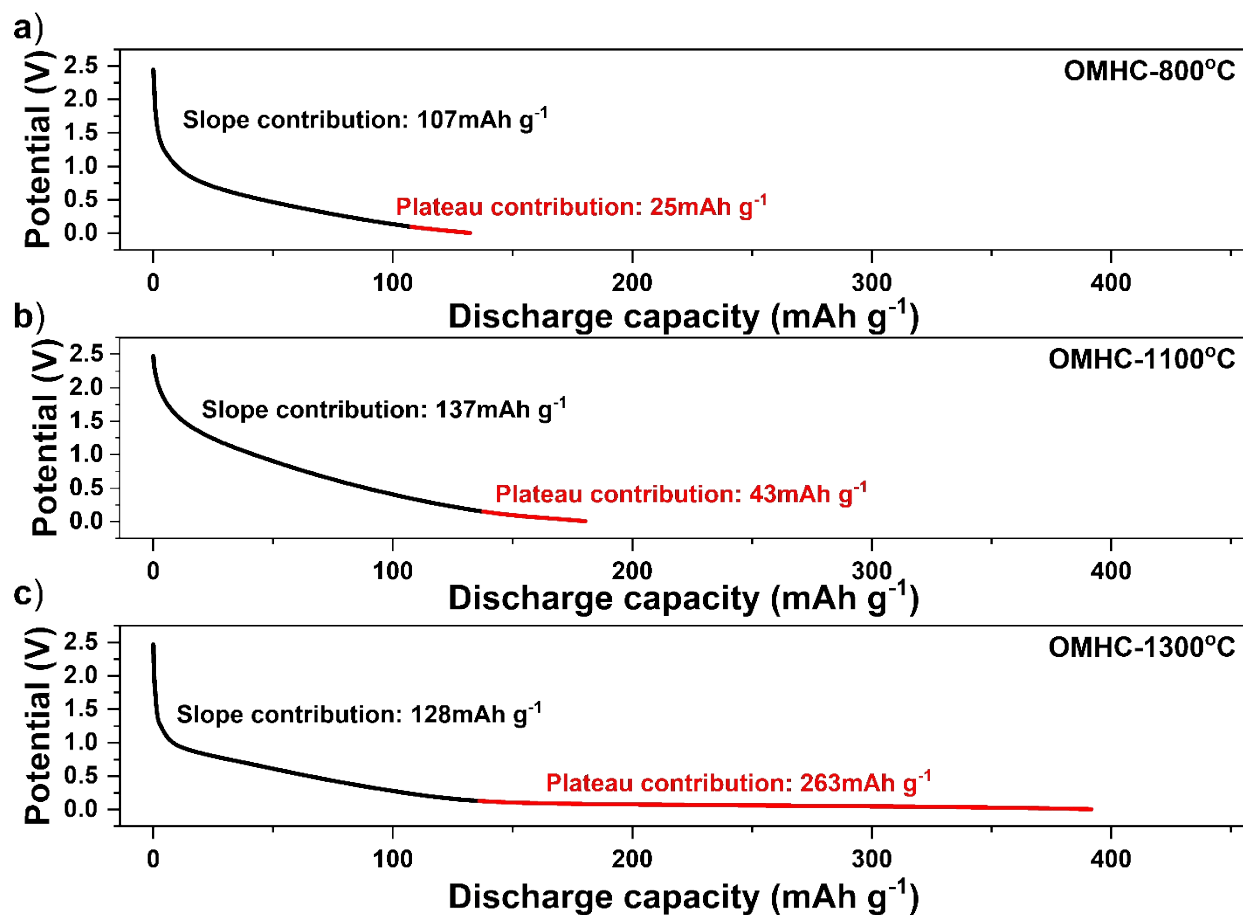

Figure S13. Split voltage profile of a) OMHC-800 °C, b) OMHC-1100 °C and c) OMHC-1300 °C into slope region (potential > 0.1V) and plateau region (potential < 0.1V) capacity contribution.

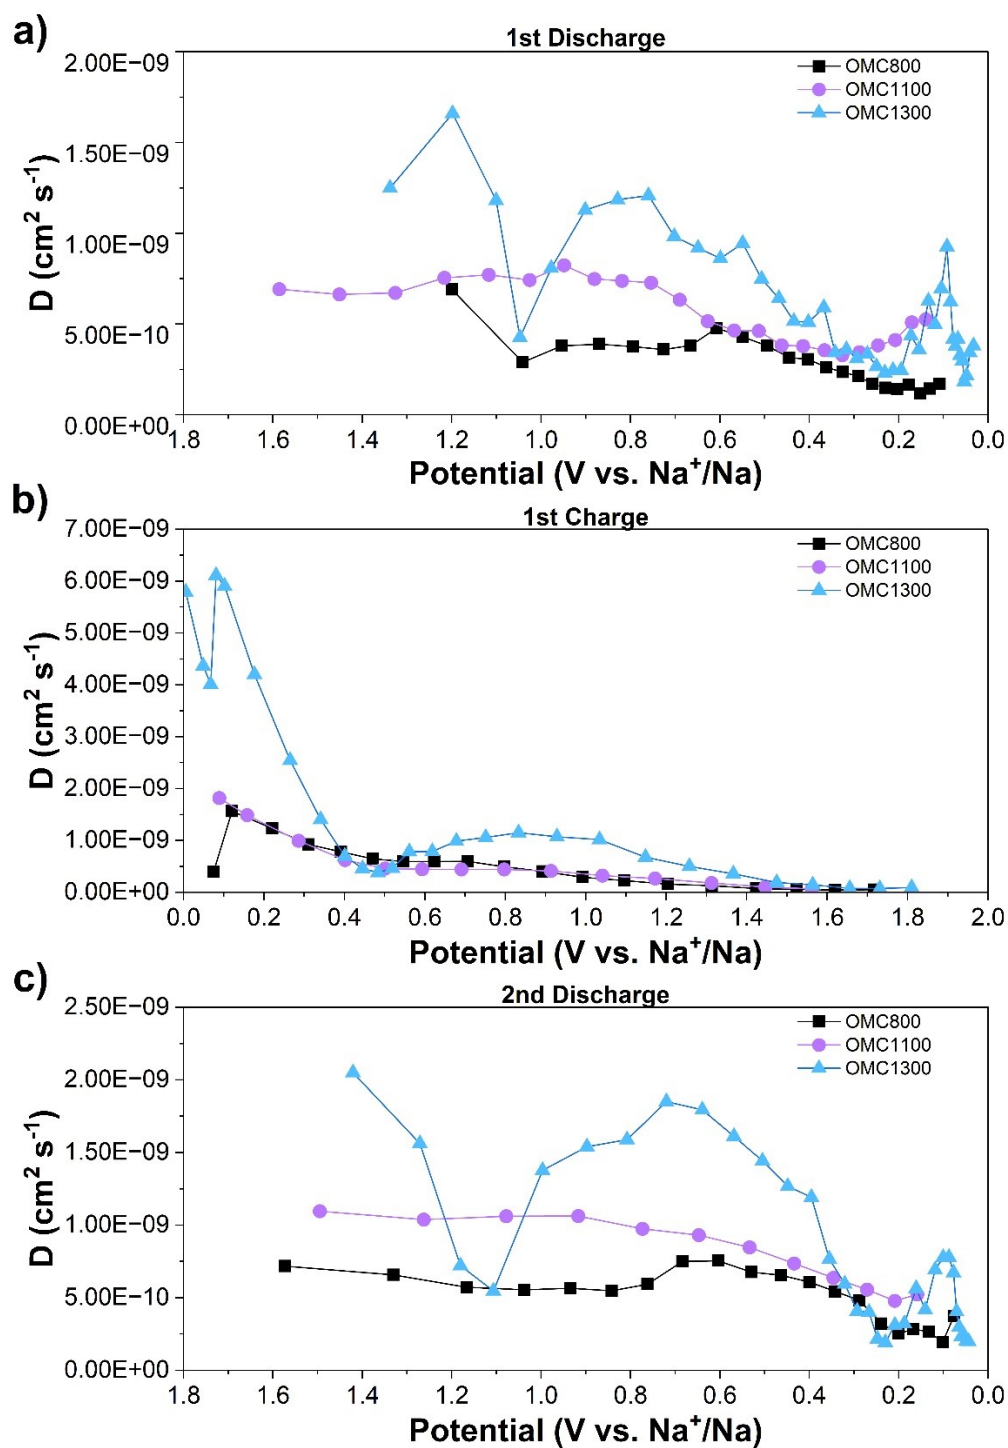

Figure S14.  $D_{\text{Na}^+}$  values of hard carbon samples OMHC 800 °C, OMHC 1100°C, and OMHC 1300 °C by GITT measurements for a) 1<sup>st</sup> sodiation, b) 1<sup>st</sup> desodiation, and c) 2<sup>nd</sup> sodiation.

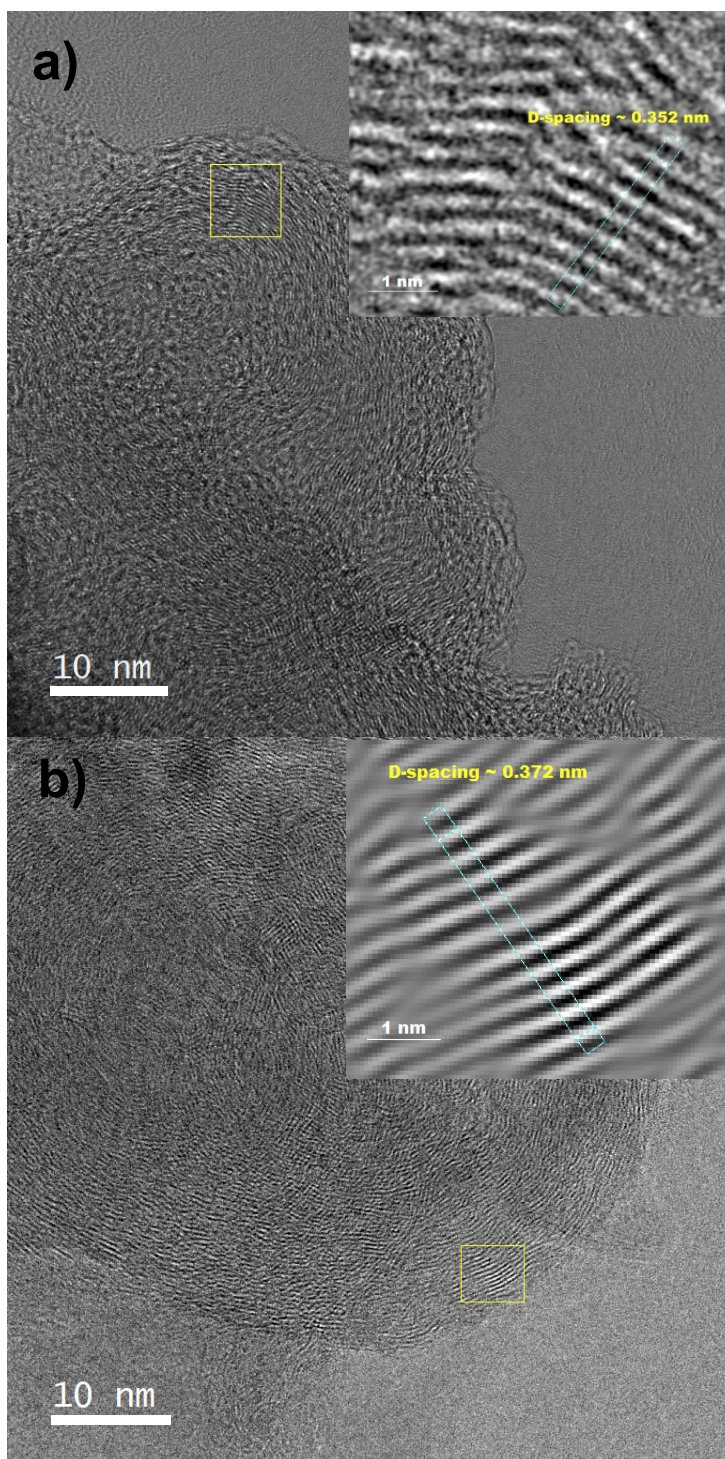

Figure S15. a) TEM of pristine OMHC-1300 °C with inset of d-spacing calculation and b) STEM of OMHC-1300 °C with inset of d-spacing calculation after 5 cycles of sodiation/desodiation.

Table S1. Structural parameters determined from XRD for all carbon anode materials used in this study

| Sample            | $d_{002}$ (Å) | $L_c$ (nm) | $L_a$ (nm) |
|-------------------|---------------|------------|------------|
| OMHC-800 °C       | 3.79          | 0.59       | 7.2        |
| OMHC-1100 °C      | 3.80          | 0.63       | 5.0        |
| OMHC-1300 °C      | 3.66          | 0.91       | 3.9        |
| Disordered carbon | 3.62          | 0.96       | 6.4        |

Table S2. Elemental composition of all carbon anode materials used in this study, determined from XPS survey scans.

| Sample            | Elemental composition (at%) |        |        |
|-------------------|-----------------------------|--------|--------|
|                   | Carbon                      | Oxygen | Sulfur |
| OMHC-800 °C       | 92.3                        | 6.3    | 1.4    |
| OMHC-1100 °C      | 93.6                        | 5.3    | 1.1    |
| OMHC-1300 °C      | 94.6                        | 4.4    | 1.0    |
| Disordered carbon | 93.2                        | 6.1    | 0.7    |

Table S3. Relative ratios of carbon and sulfur peak intensities for all carbon anode materials used in this study, determined from high-resolution XPS scans.

| Sample            | Carbon (at%) |       |       | Sulfur (at%)            |                         |       |
|-------------------|--------------|-------|-------|-------------------------|-------------------------|-------|
|                   | O-C=O        | C-O-C | C=C-C | C-S-C 2p <sub>3/2</sub> | C-S-C 2p <sub>1/2</sub> | C-S-O |
| OMHC-800 °C       | 10           | 24    | 66    | 41                      | 33                      | 26    |
| OMHC-1100 °C      | 12           | 34    | 53    | 37                      | 38                      | 25    |
| OMHC-1300 °C      | 13           | 29    | 58    | 48                      | 26                      | 26    |
| Disordered carbon | 11           | 31    | 58    | 37                      | 17                      | 47    |

Table S4. State of the art sodium hard carbon battery performance and this work.

| Classification          | Precursor                                             | Carbonization condition                                                 | Electrolyte                                     | Cathode composition                    | Active material loading (mg/cm <sup>2</sup> ) | Potential window | Applied current                             | Initial capacity (mAh/g)       | Reversible capacity (mAh/g)  | ICE (%)                          | Cycles/ Retention rate                                 |
|-------------------------|-------------------------------------------------------|-------------------------------------------------------------------------|-------------------------------------------------|----------------------------------------|-----------------------------------------------|------------------|---------------------------------------------|--------------------------------|------------------------------|----------------------------------|--------------------------------------------------------|
| Biological waste        | Rubber wood (2019) <sup>1</sup>                       | 350 °C for 1h then 900 °C for 1h in Ar                                  | 1M NaClO <sub>4</sub><br>EC:DEC (1:1)           | HC:SP:CMC:SBR (7:1.5:1:0.5) on Cu foil | 1.8-2.0                                       | 0.001-2.0V       | 100 mA/g<br>5 A/g<br>10 A/g<br>15 A/g       | 423<br>-<br>-<br>-             | 275<br>85<br>66<br>45        | 56<br>-<br>-<br>-                | 500/70%<br>250/<br>250/<br>4500/-                      |
|                         | Waste tea (2020) <sup>2</sup>                         | 1400 °C for 2h in Ar                                                    | 1M NaClO <sub>4</sub><br>EC:DEC (1:1)           | HC:SP:PVDF (8:1:1) on Cu foil          | 1.0                                           | 0-2.5V           | 60 mA/g                                     | 410                            | 223.3                        | 69                               | 200/83%                                                |
|                         | Corn stalk (2021) <sup>3</sup>                        | 800 °C for 1h in Ar                                                     | 1M NaClO <sub>4</sub><br>EC:DEC (1:1)           | HC:AB:PVDF (8:1:1) on Cu foil          | -                                             | 0.01-2.8V        | 100 mA/g                                    | 2019                           | 400                          | 21                               | 500/-                                                  |
|                         | Bagasse (2021) <sup>4</sup>                           | 1000 °C for 2h in Ar                                                    | 1M NaPF <sub>6</sub><br>EC:DEC (1:1) + 5wt% FEC | HC:SP:PVDF (8:1:1) on Al foil          | 1.5-2.0                                       | 0.02-2.0V        | 25 mA/g<br>1 A/g                            | 331.3<br>-                     | 242.1<br>-                   | 73.1<br>-                        | -<br>800/91.5%                                         |
|                         | Lignen (2022) <sup>5</sup>                            | 1600 °C for 2h in Ar                                                    | 1M NaPF <sub>6</sub><br>DEGDME                  | HC:AB:PVDF (8:1:1) on Cu foil          | -                                             | 0-3.0V           | 100 mA/g<br>500 mA/g                        | 373<br>258                     | 303<br>163.4                 | 75<br>63.29                      | 200/<br>200/-                                          |
|                         | Camillia shell and coal-tar pitch (2025) <sup>6</sup> | 400 °C for 3h then 1400 °C for 3h in Ar                                 | 1M NaPF <sub>6</sub><br>EC:DEC (1:1)            | HC:SP:CMC (9.4:0.4:0.2) on Cu foil     | 1.0-1.2                                       | 0-2.0V           | 20 mAh/g<br>50 mAh/g<br>200 mA/g<br>0.5 A/g | 385<br>-<br>-<br>-             | 328<br>330<br>170<br>-       | 86<br>-<br>-<br>-                | -<br>-<br>1000/97.9%<br>2000/75.7%                     |
| Animal and plant organs | Lotus Seedpods (2019) <sup>7</sup>                    | 1200 °C for 2h in Ar                                                    | 1M NaClO <sub>4</sub> in PC + 2wt% FEC          | HC:SP:PVDF (8:1:1) on Cu foil          | -                                             | 0.01-2.5         | 50 mA/g<br>200 mA/g                         | -<br>-                         | 328.8<br>201.8               | 50.4<br>-                        | 200/89.7%<br>500/80%                                   |
|                         | Eggshell (2021) <sup>8</sup>                          | 1600 °C for 2h in Ar                                                    | 1M NaClO <sub>4</sub> in PC:EC (1:1) +5wt% FEC  | HC:CB:CMC (8:1:1) on Cu foil           | 1.5-2.0                                       | 0.01-3V          | 30 mA/g                                     | 412.2                          | 329.8                        | 80                               | 100/73%                                                |
|                         | Lotus Leaves (2021) <sup>9</sup>                      | 800 °C for 2h in Ar                                                     | 1M NaClO <sub>4</sub> in PC:EC (1:1)            | HC:SP:PVDF (8:1:1) on Al foil          | 2.5 ± 0.77                                    | 0.01-2.5V        | 40 mA/g                                     | 378                            | 250                          | 66                               | 100/-                                                  |
| Biological extracts     | Sucrose (2018) <sup>10</sup>                          | 1300 °C for 2h in Ar                                                    | 1M NaClO <sub>4</sub><br>EC:DEC (1:1)           | HC:SC:PA (8:1:1) on Cu foil            | -                                             | 0-2.0V           | 20 mA/g                                     | 419                            | 361                          | 86.1                             | 100/93.4%                                              |
|                         | Glucose (2024) <sup>11</sup>                          | 1400 °C for 2h in Ar                                                    | 1M NaPF <sub>6</sub> in diglyme                 | HC:AB:SA (9:0.5:0.5) on Cu foil        | 0.9                                           | 0.005-2.5V       | 20 mA/g<br>50 mA/g                          | 323.06<br>-                    | 319.7<br>304.9               | 98.95<br>-                       | 250/<br>300/97.9%                                      |
|                         | Tannin (2024) <sup>12</sup>                           | 500 °C for 2h then 1400 °C for 2h in Ar                                 | 1M NaPF <sub>6</sub> in diglyme                 | HC:SP:PVDF (8:1:1) on Al foil          | -                                             | 0-2.5V           | 30 mA/g<br>0.3 A/g<br>1 A/g                 | 439.8<br>-<br>-                | 361<br>309.5<br>169.2        | 82.08<br>-<br>-                  | -<br>100/<br>500/94%                                   |
| This work               | Thermoplastic elastomer (SBS)                         | 1 °C/min up to 600 °C followed by 5 °C/min up to 1300 in N <sub>2</sub> | 1M NaPF <sub>6</sub> in diglyme                 | HC:AB:SA (8:1:1) on Cu foil            | 0.7-1.5                                       | 0.005-2.5V       | 50 mA/g<br>0.5 A/g<br>1 A/g<br>2 A/g        | 505<br>403.2<br>342.8<br>138.7 | 391<br>269.7<br>211<br>113.1 | 77.43<br>66.89<br>61.56<br>81.54 | 100/78.99%<br>1000/62.08%<br>1000/51.4%<br>1000/70.73% |

## References

- (1) Muruganantham, R.; Hsieh, T.-H.; Lin, C.-H.; Liu, W.-R. Bio-Oil Derived Hierarchical Porous Hard Carbon from Rubber Wood Sawdust via a Template Fabrication Process as Highly Stable Anode for Sodium-Ion Batteries. *Materials Today Energy* **2019**, *14*, 100346. <https://doi.org/10.1016/j.mtener.2019.100346>.
- (2) Pei, L.; Cao, H.; Yang, L.; Liu, P.; Zhao, M.; Xu, B.; Guo, J. Hard Carbon Derived from Waste Tea Biomass as High-Performance Anode Material for Sodium-Ion Batteries. *Ionics* **2020**, *26* (11), 5535–5542. <https://doi.org/10.1007/s11581-020-03723-1>.
- (3) Ou, J.; Zhang, H.; Wang, H.; Lei, Y.; Wu, S. Corn Stalks Derived Hierarchical Porous Carbon as Ultra-Efficient Anode Materials for Sodium-Ion Batteries. *Diamond and Related Materials* **2021**, *120*, 108626. <https://doi.org/10.1016/j.diamond.2021.108626>.
- (4) Hu, H.-Y.; Xiao, Y.; Ling, W.; Wu, Y.-B.; Wang, P.; Tan, S.-J.; Xu, Y.-S.; Guo, Y.-J.; Chen, W.-P.; Tang, R.-R.; Zeng, X.-X.; Yin, Y.-X.; Wu, X.-W. A Stable Biomass-Derived Hard Carbon Anode for High-Performance Sodium-Ion Full Battery. *Energy Technology* **2021**, *9* (1), 2000730. <https://doi.org/10.1002/ente.202000730>.
- (5) Chen, M.; Luo, F.; Liao, Y.; Liu, C.; Xu, D.; Wang, Z.; Liu, Q.; Wang, D.; Ye, Y.; Li, S.; Wang, D.; Zheng, Z. Hard Carbon Derived for Lignin with Robust and Low-Potential Sodium Ion Storage. *Journal of Electroanalytical Chemistry* **2022**, *919*, 116526. <https://doi.org/10.1016/j.jelechem.2022.116526>.
- (6) Lei, Z.-Q.; Xiao, S.-H.; Ran, Z.; Liu, S.-P.; Su, X.-C.; Guo, Y.-J.; Li, W.-X.; Li, Q.; Xu, S.; Yin, Y.-X.; Guo, Y.-G. Circumventing Self-Diffusion Enables High-Rate Hard Carbon Anodes. *Advanced Materials n/a* (n/a), e13193. <https://doi.org/10.1002/adma.202513193>.
- (7) Wu, F.; Zhang, M.; Bai, Y.; Wang, X.; Dong, R.; Wu, C. Lotus Seedpod-Derived Hard Carbon with Hierarchical Porous Structure as Stable Anode for Sodium-Ion Batteries. *ACS Appl. Mater. Interfaces* **2019**, *11* (13), 12554–12561. <https://doi.org/10.1021/acsami.9b01419>.
- (8) Ma, L.; Cao, M.; Zhao, C. song; Huang, S.; Ding, J.; Chen, J.; Zhou, Y. The Novel N-Rich Hard Carbon Nanofiber as High-Performance Electrode Materials for Sodium-Ion Batteries. *Ceramics International* **2021**, *47* (7, Part A), 9118–9124. <https://doi.org/10.1016/j.ceramint.2020.12.035>.
- (9) Wang, C.-C.; Su, W.-L. Understanding Acid Pretreatment of Lotus Leaves to Prepare Hard Carbons as Anodes for Sodium Ion Batteries. *Surface and Coatings Technology* **2021**, *415*, 127125. <https://doi.org/10.1016/j.surfcoat.2021.127125>.
- (10) Xiao, L.; Lu, H.; Fang, Y.; Sushko, M. L.; Cao, Y.; Ai, X.; Yang, H.; Liu, J. Low-Defect and Low-Porosity Hard Carbon with High Coulombic Efficiency and High Capacity for Practical Sodium Ion Battery Anode. *Advanced Energy Materials* **2018**, *8* (20), 1703238. <https://doi.org/10.1002/aenm.201703238>.
- (11) Lu, Z.; Yang, H.; Guo, Y.; Lin, H.; Shan, P.; Wu, S.; He, P.; Yang, Y.; Yang, Q.-H.; Zhou, H. Consummating Ion Desolvation in Hard Carbon Anodes for Reversible Sodium Storage. *Nat Commun* **2024**, *15* (1), 3497. <https://doi.org/10.1038/s41467-024-47522-y>.
- (12) Hu, Q.; Xu, L.; Liu, G.; Hu, J.; Ji, X.; Wu, Y. Understanding the Sodium Storage Behavior of Closed Pores/Carbonyl Groups in Hard Carbon. *ACS Nano* **2024**, *18* (32), 21491–21503. <https://doi.org/10.1021/acsnano.4c06281>.
